# Supplementary material for: Multisystemic Cellular Tropism of SARS-CoV-2 in Autopsies of COVID-19 Patients
Source: MDPI journal article supplement (doi:10.3390/cells10081900), 2021-07-27
Supplement: s1 [file s1]

# Multisystemic Cellular Tropism of SARS-CoV-2 in Autopsies of COVID-19 Patients

Dickson W. L. Wong <sup>1,†</sup>, Barbara M. Klinkhammer <sup>1,†</sup>, Sonja Djudjaj <sup>1,†</sup>, Sophia Villwock <sup>1</sup>, M. Cherele Timm <sup>1</sup>, Eva M. Buhl <sup>1,2</sup>, Sophie Wucherpfennig <sup>1</sup>, Claudio Cacchi <sup>1</sup>, Till Braunschweig <sup>1</sup>, Ruth Knüchel-Clarke <sup>1</sup>, Danny Jonigk <sup>3,4</sup>, Christopher Werlein <sup>4</sup>, Roman D. Bülow <sup>1</sup>, Edgar Dahl <sup>1</sup>, Saskia von Stillfried <sup>1,\*,†</sup> and Peter Boor <sup>1,2,5,\*,†</sup>

- <sup>1</sup> Institute of Pathology, RWTH Aachen University Hospital, 52074 Aachen, Germany; dwong@ukaachen.de (D.W.L.W.); bklinkhammer@ukaachen.de (B.M.K.); sdjudjaj@ukaachen.de (S.D.); svillwock@ukaachen.de (S.V.); mtimm@ukaachen.de (M.C.T.); ebuhl@ukaachen.de (E.M.B.); swucherpfennig@ukaachen.de (S.W.); ccacchi@ukaachen.de (C.C.); tbraunschweig@ukaachen.de (T.B.); rknuichel-clark@ukaachen.de (R.K.-C.); rbuelow@ukaachen.de (R.D.B.); edahl@ukaachen.de (E.D.)
- <sup>2</sup> Electron Microscopy Facility, RWTH Aachen University Hospital, 52074 Aachen, Germany
- <sup>3</sup> Institute of Pathology, Hannover Medical School, 30625 Hannover, Germany; jonigk.danny@mh-hannover.de (D.J.); Werlein.Christopher@mh-hannover.de (C.W.)
- <sup>4</sup> Member of the German Center for Lung Research (DZL), Biomedical Research in Endstage and Obstructive Lung Disease Hannover (BREATH), 30625 Hannover, Germany
- <sup>5</sup> Department of Nephrology and Immunology, RWTH Aachen University Hospital, 52074 Aachen, Germany
- \* Correspondence: svonstillfri@ukaachen.de (S.v.S.); pboor@ukaachen.de (P.B.); Tel: +49-241-80-85227 (P.B.); Fax: +49-241-80-82446 (P.B.)
- † Equally contributed

## Supplementary information

### Supplementary Method

#### External study cohort

Table S1. List of autopsies from different decedents organized in the TMA.

Table S2. Major pathological findings in the autopsy cohort.

Table S3. Patient characteristics of the external COVID-19 study cohort.

Figure S1. Validation of FISH detection on human autopsies.

Figure S2. Virus detection in respiratory system by FISH.

Figure S3. Virus detection in respiratory system by IHC staining.

Figure S4. Validation of CISH detection on external human autopsies.

Figure S5. Detection of SARS-CoV-2 sense, antisense, ACE2 and TMPRSS2 on an external sample by CISH.

### Supplementary Method

#### SARS-CoV-2 RNA detection with Chromogenic in situ hybridization (CISH)

We performed CISH staining on the 1-µm-thick paraffin tissue microarray sections (n = 9 patients) received from an external COVID-19 autopsy center (provided by Prof. D. Jonigk, Institute of Pathology, Hannover Medical School) with the RNAscope® 2.5 HD Duplex Reagent Kit (Advanced Cell Diagnostics, Inc., Hayward, California, USA). The procedure is analogous to FISH until the amplifier steps. Instead of fluorophore, horseradish peroxidase (HRP) and alkaline phosphatase (AP) were conjugated to the C1 (cyan)

and C2 (red) probe, respectively. We applied the same probes used in FISH staining to the tissues. Lastly, tissue slides were counterstained with Gills Haematoxylin (Sigma-Aldrich, St. Louis, MO, USA) and mounted with EcoMount solution (Biocare Medical; Concord, California, USA). Stained slides were analyzed with Aperio VERSA Brightfield, Fluorescence & FISH Digital Pathology Scanner (Leica Microsystems Inc, Buffalo Grove, IL, USA).

The main characteristics of the external study cohort (9 male/ 4 female; median age 76 (54–96) years) are given in Table S3. The period between the hospital admission and death ranged from 3 to 22 days (median 9 days, Figure 1). 12 patients had a previous diagnosis of hypertension (n=11) and/ or diabetes mellitus type 2 (n=5). Four patients had a history of tobacco abuse, four patients were non-smokers, while no information on current or previous tobacco abuse was available for the remaining five patients. Six patients were treated with mechanical ventilation. One patient refused mechanical ventilation. Five patients received no ventilation therapy due to a palliative situation.

[illegible]

**Table S2.** Major pathological findings in the autopsy cohort.

| Patient/<br>sex | DAD                                           | Inflammation                                                                         | Pulmonary      |                                  |                           |                                                                                  | Extra-pulmonary                                                                                                                                                                                                                                                                          |                                                                                                                                                                  |                                                                                              |
|-----------------|-----------------------------------------------|--------------------------------------------------------------------------------------|----------------|----------------------------------|---------------------------|----------------------------------------------------------------------------------|------------------------------------------------------------------------------------------------------------------------------------------------------------------------------------------------------------------------------------------------------------------------------------------|------------------------------------------------------------------------------------------------------------------------------------------------------------------|----------------------------------------------------------------------------------------------|
|                 |                                               |                                                                                      | Giant<br>cells | Squa-<br>mous<br>metapla-<br>sia | Hyaline<br>mem-<br>branes | Additional<br>observation                                                        | Cardiovascular                                                                                                                                                                                                                                                                           | Urogenital                                                                                                                                                       | Gastrointestinal                                                                             |
|                 |                                               |                                                                                      |                |                                  |                           |                                                                                  | Heart                                                                                                                                                                                                                                                                                    | Kidney                                                                                                                                                           | Liver                                                                                        |
| 1/ M            | Prolifera-<br>tive/ or-<br>ganizing<br>phase  | Interstitial in-<br>filtrate                                                         | +              | +                                | +                         | Intraalveolar<br>edema, focal<br>organized<br>pneumonia                          | Normal heart weight,<br>fibrosis in endocar-<br>dium, patchy myocar-<br>dium infiltrate                                                                                                                                                                                                  | Type 1 diabetes<br>and nodular<br>glomeruloscle-<br>rosis, no signifi-<br>cant chronic in-<br>flammation                                                         | Steatosis, intra-<br>cytoplasmic cho-<br>lelasis                                             |
| 2/ F            | Prolifera-<br>tive/ or-<br>ganizing<br>phase  | Interstitial<br>lymphocytic<br>inflammation                                          | -              | ++                               | +                         | Hyaline mi-<br>crothrombi,                                                       | Slight cardiomegaly,<br>patchy lymphocytic in-<br>filtrate in epicardium,<br>macrophages (signs of<br>previous bleeding), ab-<br>sorptive/ reactive in-<br>flammation, endocar-<br>dial fibrosis, discrete<br>pericarditis, perivascu-<br>lar fibrosis, signs of<br>cellular hypertrophy | Inflammatory<br>cells only in fi-<br>brotic areas                                                                                                                | Liver cirrhosis,<br>chronic inflam-<br>mation in capsule<br>and fibrotic areas,<br>steatosis |
| 3/ M            | Prolifera-<br>tive phase                      | Superinfec-<br>tion with<br>acute inflam-<br>mation                                  | -              | -                                | + (very<br>focal)         | Intra-alveo-<br>lar edema,<br>Intra-alveo-<br>lar hemor-<br>rhage                | Cardiomegaly, cellular<br>hypertrophy, very<br>scarce lymphocytes,<br>single cell necrosis, fo-<br>cal fibrosis                                                                                                                                                                          | Hypertensive<br>damage, in-<br>flammation<br>only in fibrotic<br>areas, no perit-<br>ubular capil-<br>laritis                                                    | Disseminated in-<br>flammation, stea-<br>tosis                                               |
| 4/ M            | Prolifera-<br>tive/ or-<br>ganizing<br>phase  | Interstitial in-<br>flammation                                                       | +              | +                                | -                         | Hemor-<br>rhage,<br>thromboem-<br>bolus in<br>small pul-<br>monary ar-<br>teries | Cardiomegaly, peri-<br>vascular lymphocyte,<br>eosinophilic neutrophil<br>infiltrate, discrete<br>chronic inflammation                                                                                                                                                                   | Chronic inflam-<br>mation, single<br>sclerotic glo-<br>meruli, acute<br>kidney injury                                                                            | Cholangitis lenta,<br>chronic inflam-<br>mation of biliary<br>ducts                          |
| 5/ M            | Prolifera-<br>tive/ or-<br>ganizing           | Acute pneu-<br>monia with<br>granulocytes,<br>macrophage,<br>acute inflam-<br>mation | +              | +                                | +                         | Intraalveolar<br>edema, in-<br>tra-alveolar<br>hemorrhage                        | Cardiomegaly, patchy<br>myocardial infiltrate,<br>histiocytic infiltrate,<br>discrete chronic in-<br>flammation                                                                                                                                                                          | Chronic inflam-<br>mation, single<br>sclerotic glo-<br>meruli, acute<br>kidney injury,<br>peritubular ca-<br>pillaries/ vasa<br>recta with lots<br>of leukocytes | Cholangitis lenta,<br>chronic inflam-<br>mation of biliary<br>ducts                          |
| 6/ F            | Prolifera-<br>tive phase                      | Interstitial in-<br>flammation                                                       | ++             | +                                | +                         | Thrombus,<br>Lung metas-<br>tasis, in-<br>traalveolar<br>edema,<br>bronchitis    | Slight cardiomegaly,<br>patchy myocardial in-<br>filtrate                                                                                                                                                                                                                                | Patchy inflam-<br>matory infil-<br>trate, some<br>peritubular ca-<br>pillaries with<br>leukocytes                                                                | Lymphocytes in<br>sinusoids, no<br>other pathology                                           |
| 7/ M            | Prolifera-<br>tive and fi-<br>brotic<br>phase | Intra-alveolar<br>granulocytes                                                       | ++             | +                                | -                         | Intraalveolar<br>edema,                                                          | Normal heart weight,<br>histiocytic infiltrate                                                                                                                                                                                                                                           | Focal chronic<br>inflammation,<br>primarily in fi-<br>brotic areas,                                                                                              | Cholangitis lenta,<br>chronic inflam-<br>mation of biliary<br>ducts                          |

|      |                                  |                                               |   |   |   |                                               |                                                    |                                 |                                         |
|------|----------------------------------|-----------------------------------------------|---|---|---|-----------------------------------------------|----------------------------------------------------|---------------------------------|-----------------------------------------|
|      |                                  |                                               |   |   |   |                                               |                                                    | some in peritubular capillaries |                                         |
| 8/ F | Proliferative and fibrotic phase | Granulocytes, chronic inflammatory infiltrate | - | - | + | Intraalveolar hemorrhage, intraalveolar edema | Slight cardiomegaly, inflammation only in fibrosis | Rejection, cirrhotic kidney     | Perivascular and sinusoidal lymphocytes |

**Table S3.** Patient characteristics of the external COVID-19 study cohort.

| Patient | Sex | Age range (y) | BMI              | Smoker | Hospital admission to death (d) | Ventilation therapy |
|---------|-----|---------------|------------------|--------|---------------------------------|---------------------|
| 1       | M   | 91-95         | Underweight      | No     | 14                              | No                  |
| 2       | M   | 76-80         | Moderately obese | n.a.   | 22                              | Yes                 |
| 3       | M   | 71-75         | Severely obese   | n.a.   | 12                              | Yes                 |
| 4       | F   | 66-70         | n.a.             | n.a.   | 14                              | n.a.                |
| 5       | F   | 76-80         | n.a.             | n.a.   | 7                               | Yes                 |
| 6       | M   | 51-55         | n.a.             | n.a.   | 21                              | Yes                 |
| 7       | M   | 76-80         | Severely obese   | Yes    | 3                               | Yes                 |
| 8       | M   | 66-70         | Overweight       | Yes    | 9                               | Yes                 |
| 9       | M   | 71-75         | Overweight       | Yes    | 3                               | No                  |
| 10      | F   | 81-85         | Overweight       | Yes    | 4                               | No                  |
| 11      | F   | 66-70         | Severely obese   | No     | 9                               | No                  |
| 12      | M   | 86-90         | Overweight       | No     | 5                               | No                  |
| 13      | M   | 96-100        | Normal weight    | No     | 3                               | No                  |

BMI = Body-mass index; d = day; y = year.

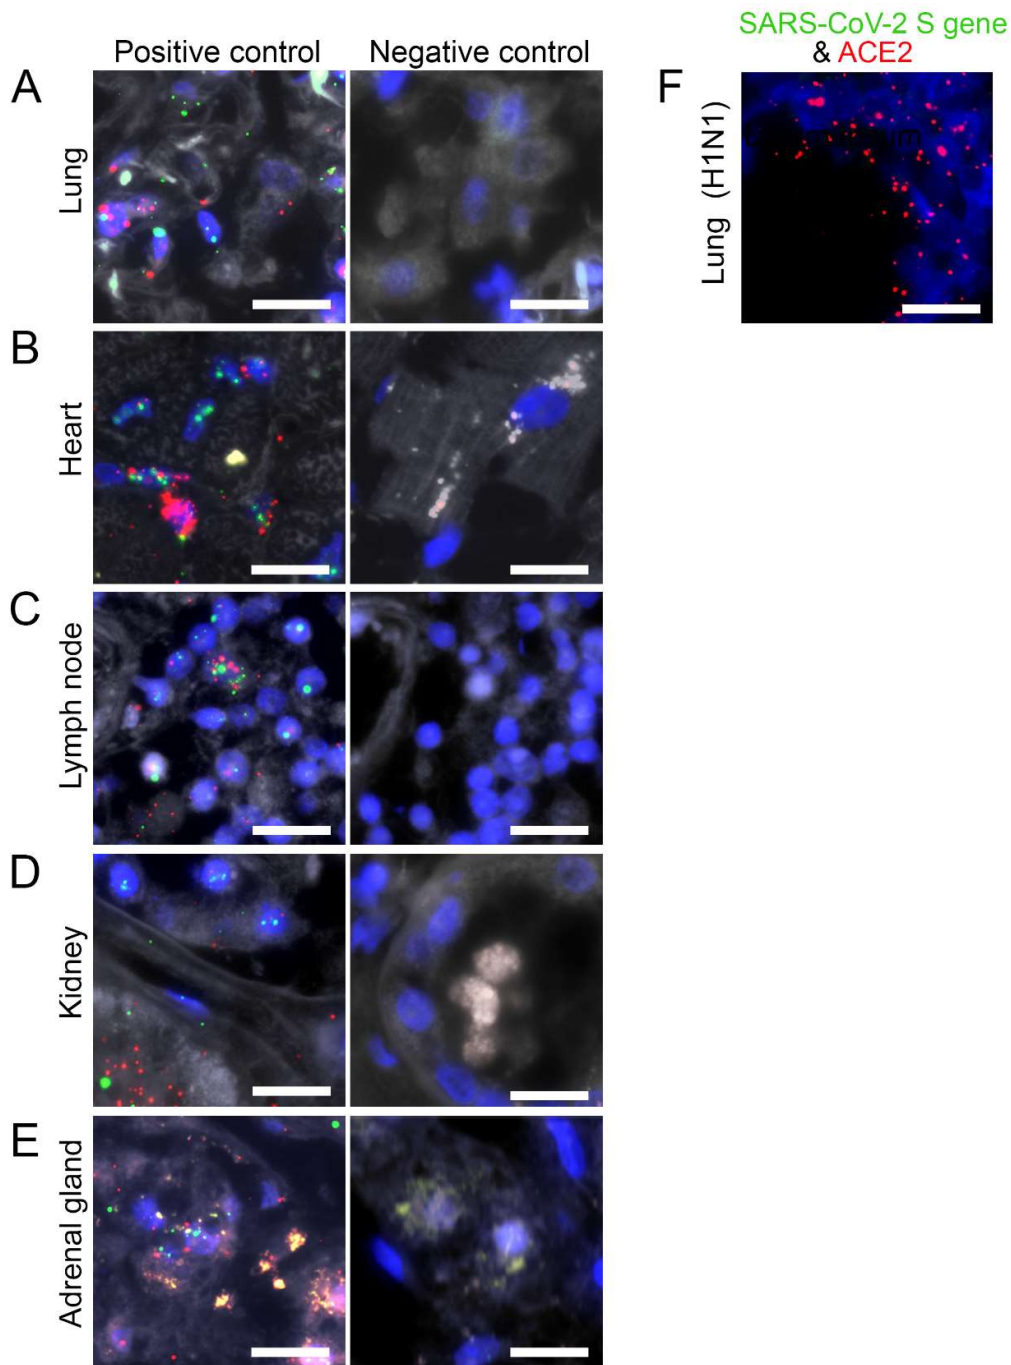

**Figure S1.** Validation of FISH detection on human autopsies. FISH method was validated by incubation of probes targeting *Homo sapiens* *POLR2A* (green) and *PPIB* (red) genes as positive controls, and *dap* gene of *Bacillus subtilis* as a negative control in the lung (A), heart (B), lymph node (C), kidney (D) and adrenal gland (E) autopsies. Probes against SARS-CoV-2 (green; absent) and *Homo sapiens* *ACE2* (red) were incubated with a lung autopsy collected from a patient diagnosed with influenza A virus subtype H1N1 before COVID-19 outbreak (F). Scale bars represent 20 μm.



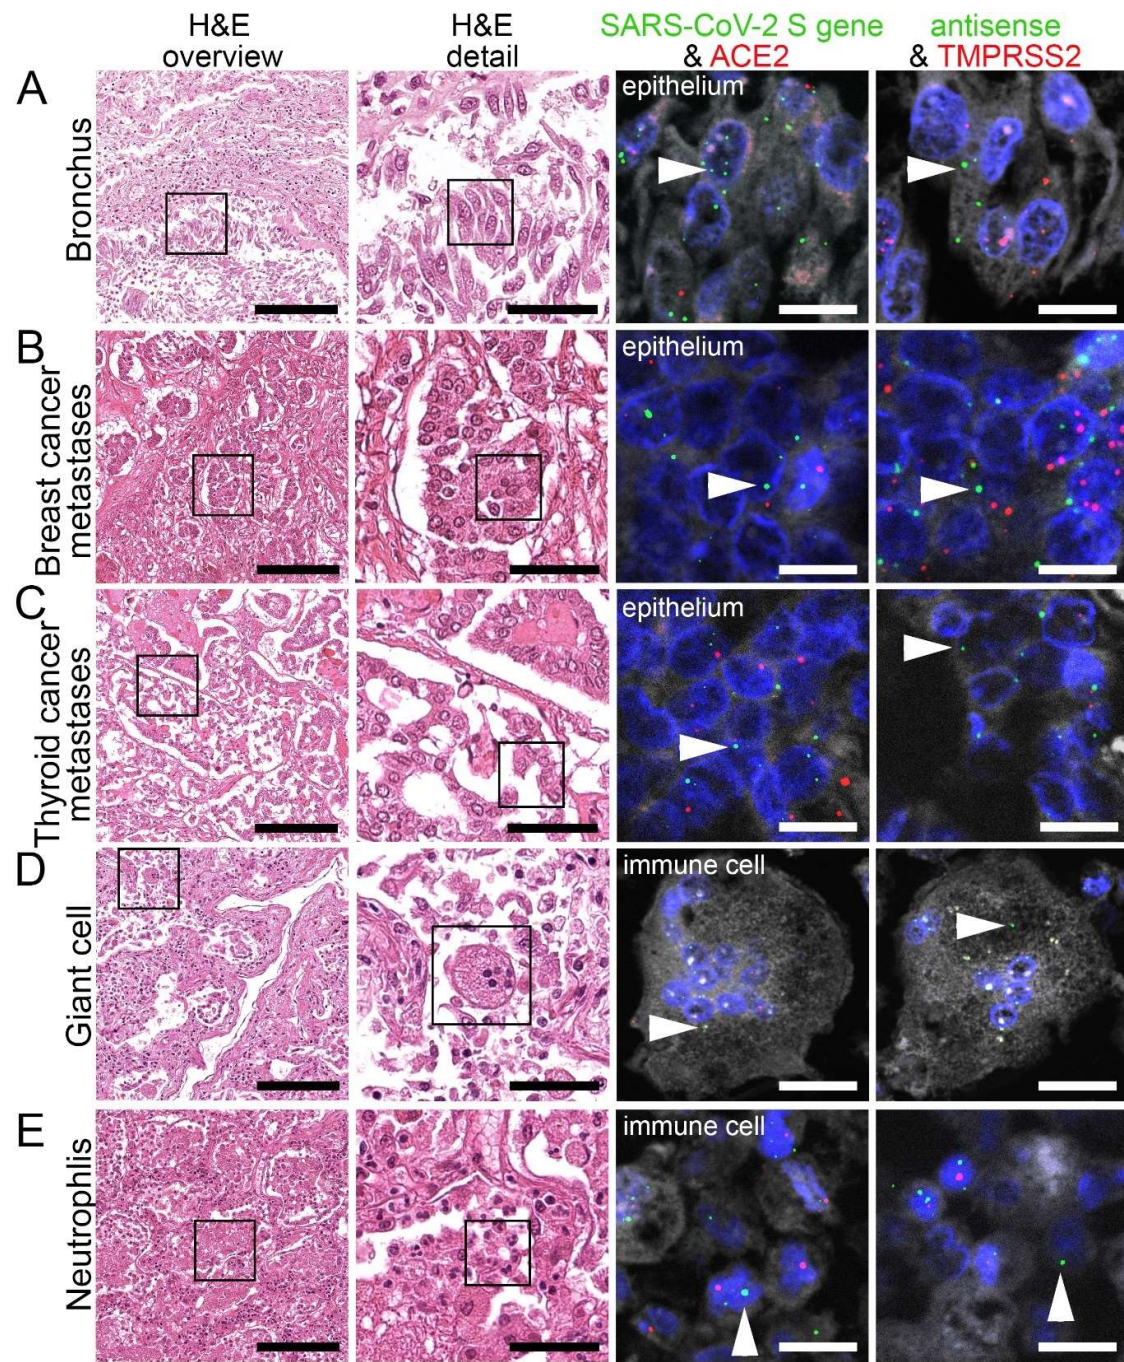

**Figure S2.** Virus detection in respiratory system by FISH. HE stained lung tissue and representative image sections showing FISH co-visualization of RNA sequences either of SARS-CoV-2 S gene genomic RNA (green, arrowhead) and ACE2 (red) or SARS-CoV-2 antisense strand replicating RNA (green, arrowhead) and TMPRSS2 (red). Morphological details are shown in regions of a bronchus (A), metastasis from breast cancer (B) and thyroid cancer (C) and immune cells, i.e., multinucleated giant cells (D) and neutrophils (E). Scale bars represent 200, 50 and 10  $\mu$ m (A, B, C, D, F) or 20  $\mu$ m (E), respectively.

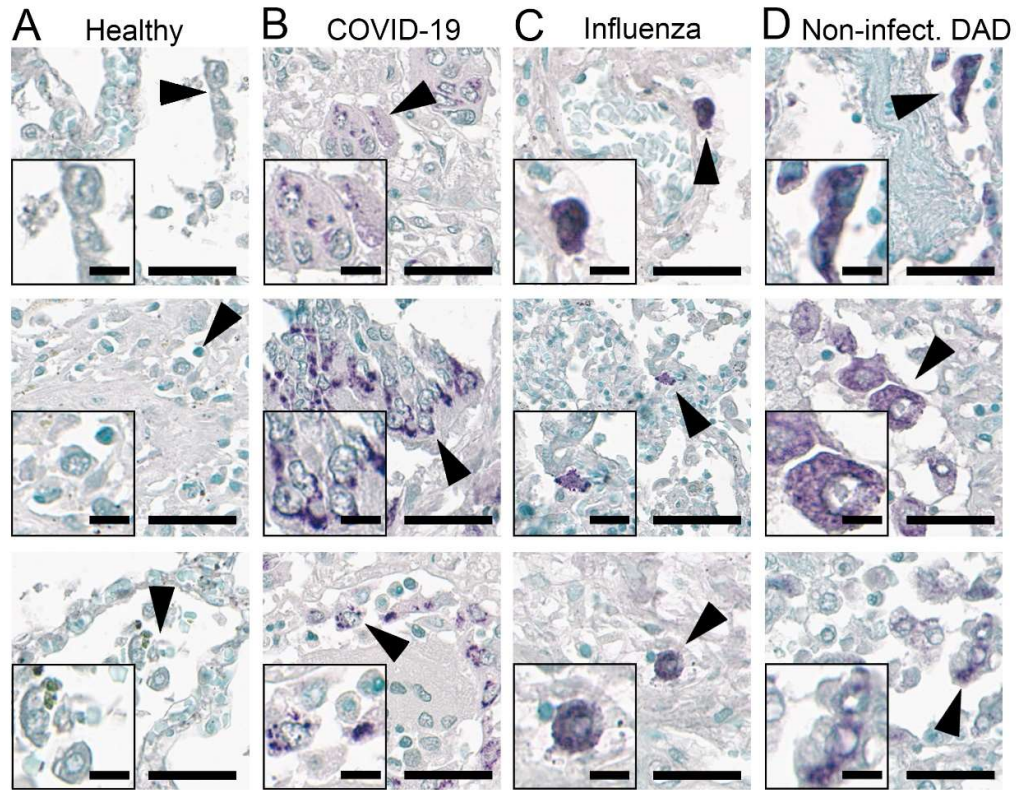

**Figure S3.** Virus detection in the respiratory system by IHC staining. Representative IHC staining of SARS spike glycoprotein (#Ab272420) in the autopsy lung tissues collected from different patients in each group of our cohort, consisting of patients without pulmonary disease/ healthy lung (A), COVID-19 patients (B), patients infected with influenza A virus subtype H1N1 (C) or diffuse alveolar damage (non-infectious, D). Scale bars represent 40  $\mu$ m and 10  $\mu$ m (insert).



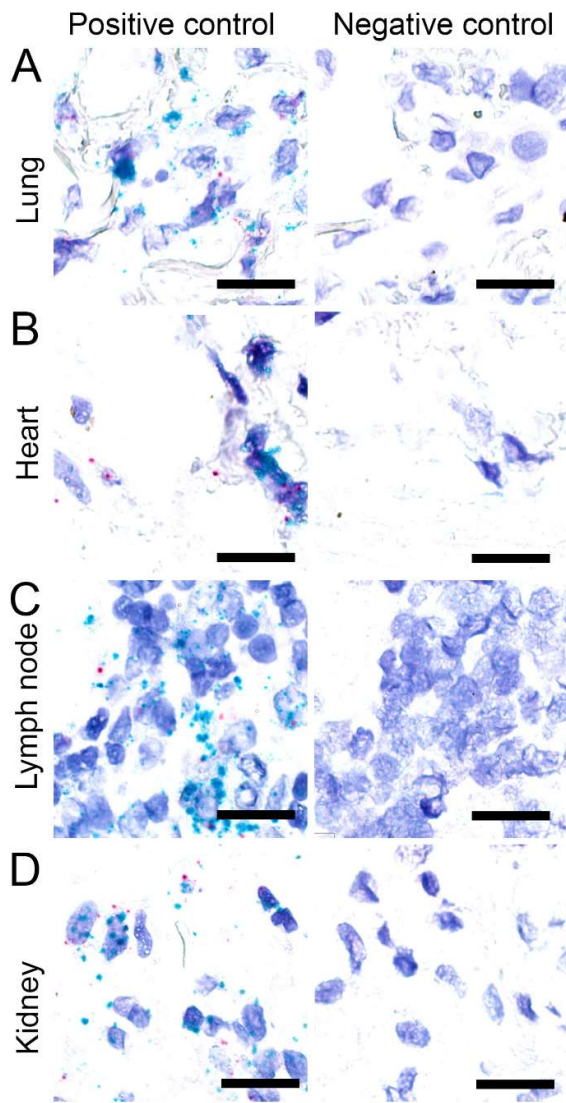

**Figure S4.** Validation of CISH detection on external human autopsies. CISH method was validated by incubation of probes targeting *Homo sapiens* *POLR2A* (cyan) and *PPIB* (red) genes as positive controls, and *dap* gene of *Bacillus subtilis* as a negative control in the lung (A), heart (B), lymph node (C) and kidney (D) autopsies. Scale bars represent 20  $\mu$ m.



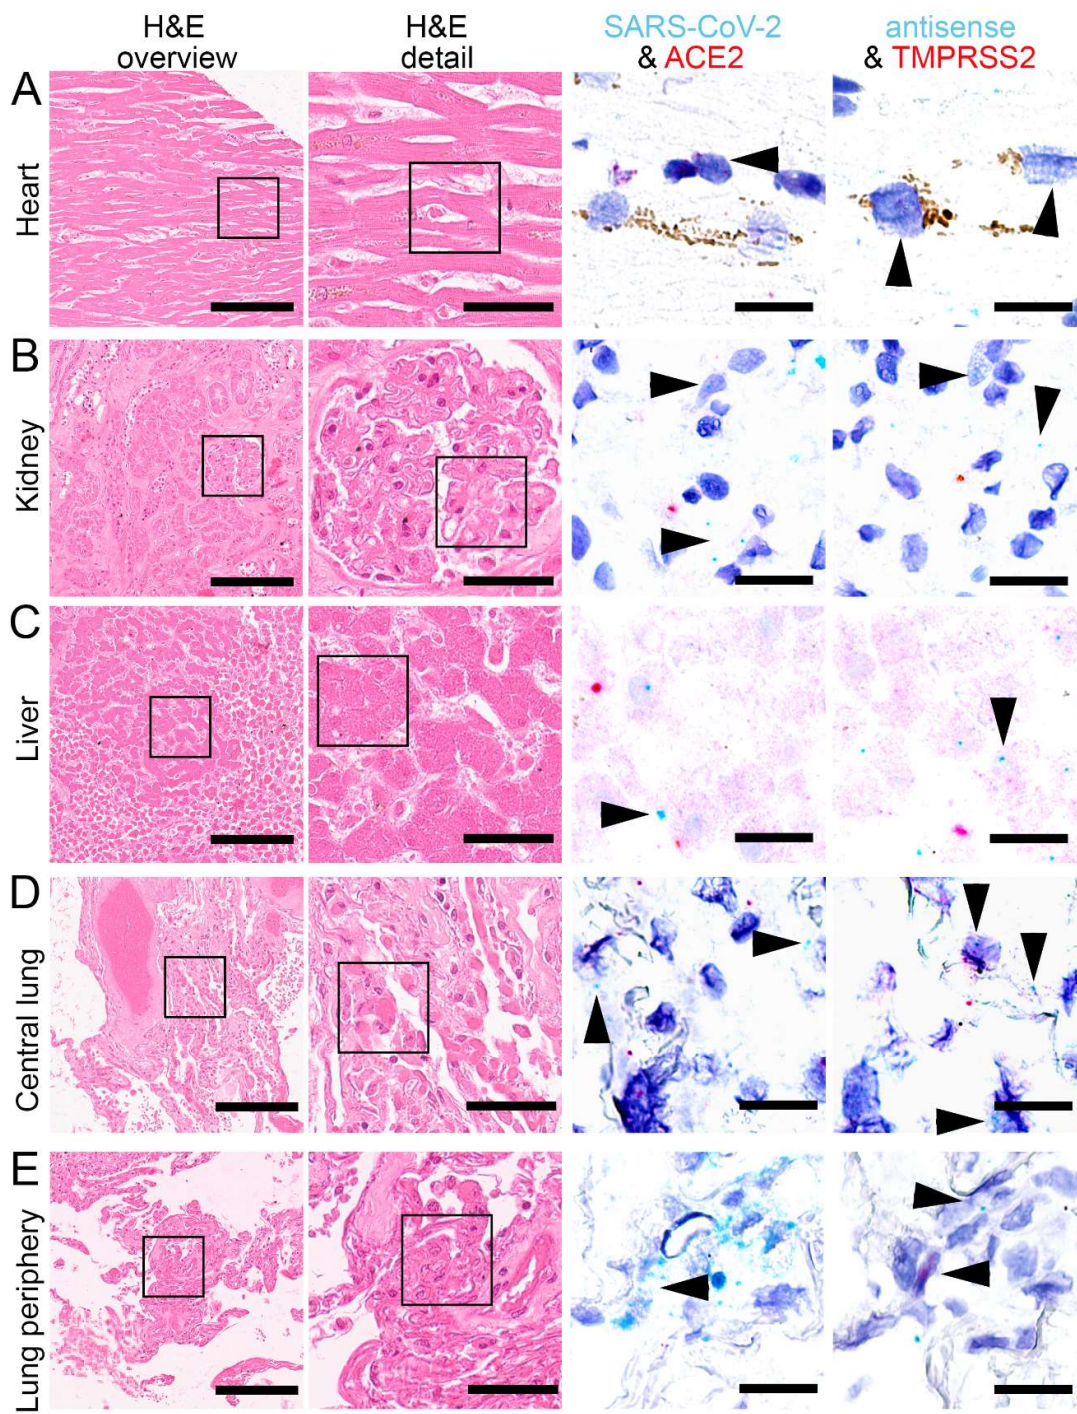



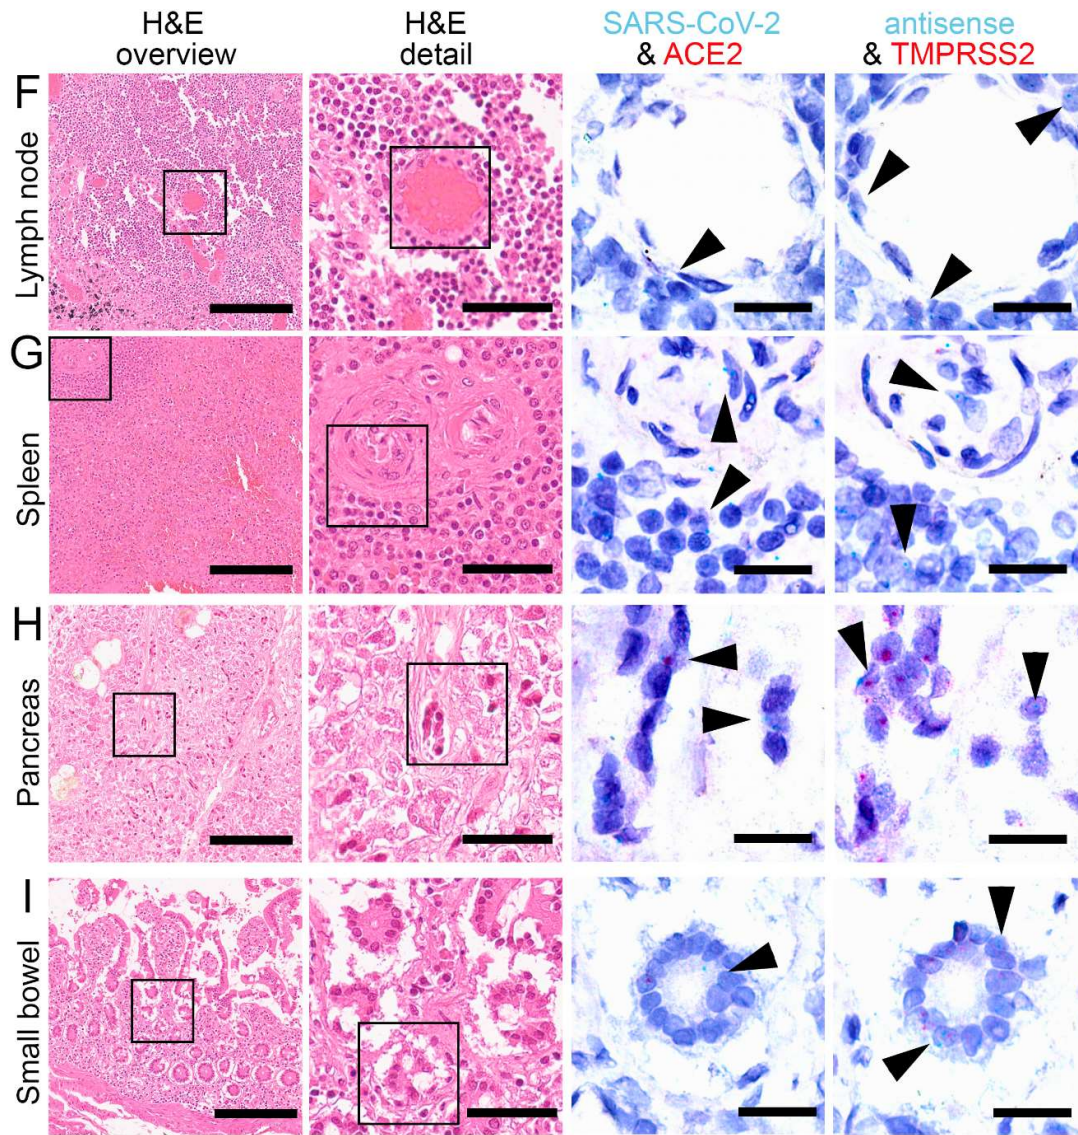

**Figure S5.** Detection of SARS-CoV-2 sense, antisense, ACE2 and TMPRSS2 on external samples by CISH. HE stained tissue and representative image sections showing CISH co-visualization of RNA sequences either of SARS-CoV-2 S gene genomic RNA (cyan, arrowhead) and ACE2 (red) or SARS-CoV-2 antisense strand RNA indicating replicating virus (cyan, arrowhead) and TMPRSS2 (red) in the heart (A, cardiomyocyte), kidney (B, glomerulus), liver (C, hepatocyte), central lung (D, alveolus), lung periphery (E, alveolus), lymph node (F, capillary endothelial cells), spleen (G, capillary endothelial cells), pancreas (H, ductal epithelial cells) and small bowel (I, enterocytes). Scale bars represent 200, 50 and 20  $\mu\text{m}$ , respectively.
